# Supplementary material for: Highly precise and accurate isotopic analysis of small amounts of Pb using205Pb–204Pb and207Pb-204Pb, two double spikes
Source: Royal Society of Chemistry journal article supplement (doi:10.1039/b310294g), 2003-01-01
Supplement: esi-rev.doc [file esi-rev.doc]

This journal is © The Royal Society of Chemistry 2003

Electronic supplementary information

In this ESI, a model to calculate propagated errors for isotopic compositions of unknown samples (*u*i), a method of data reduction for calculating internal precision of each run, optimization method of the 205Pb-204Pb spike composition, and calibration procedures of the compositions of the 207Pb-204Pb and 205Pb-204Pb spikes are described.

**Error model**

The propagated errors for isotopic ratios of samples are calculated using the model modified from that of Hamelin *et al*. (ref. 1 in the text). Equations (5) and (6) in the text can be combined to express as follows

, (1)

where

(2)

(3)

. (4)

In equation (3), the variables *r*m and *r*n are

.

The solution of equation (1) is given by

, (5)

from which the corrected isotope ratios of the sample (*u*i) can be directly obtained.

The errors for the corrected isotopic ratios of the sample are obtained through the variance-covariance matrix of **B**:

. (6)

By following the method of Hamelin *et al*. (ref. 1 in the text), the matrix **V***B* is obtained as

, (7)

where **K** and **L** are the diagonal matrices with elements 1 + *p* + i · *r*m and 1 + *q* + i · *r*n, respectively,

(8)

.

(9)

In equation (7), **V**S’, **V**T’, **V**M’, and **V**N’ are the variance-covariance matrices for the isotopic ratios of the 207Pb-204Pb spike, 205Pb-204Pb spike, 207Pb-204Pb spike–sample mixture, and 205Pb-204Pb spike–sample mixture, respectively. For example,

(10)

.

(11)

In the matrix **V**B, the elements **V**B (k,l) (5 ≤ k ≤7; 5 ≤ l ≤7) give the variance and covariance of the corrected isotope ratios of the sample (*u*i): **V**B (5,5) = and **V**B (5,6) = **V**B (6,5) = cov(*u*1, *u*2), for example.

**Data reduction for calculating internal precision of each run**

In order to calculate the propagated error for isotopic ratios of unknown samples, the analytical errors (internal precisions) for the two spiked runs (matrices **V**M and **V**N), in addition to the uncertainty of the spike compositions (matrices **V**S and **V**T), are necessary. A scatter of the raw scan data cannot be used to obtain the internal precisions of individual runs, because it also includes the variations resulting from the mass fractionation during mass spectrometry (ref. 19 in the text). In this study, internal precisions for both runs are obtained through the following “average-normalization method”.

All raw scan data are normalized using their average (corresponding to the uncorrected raw measured data), in the same way as the 86Sr/88Sr ratio is used for the Sr isotope measurements. For each of the scan data, the fractionation factor is calculated using its 208Pb/204Pb ratio and the ratio of the average data. Then, 207Pb/204Pb, 206Pb/204Pb, and 205Pb/204Pb ratios of the scan data are normalized using the calculated fractionation factor. The 208Pb/204Pb ratio itself is normalized using the fractionation factor calculated from the 207Pb/204Pb ratio of each scan datum and that of the average data. The internal precision of the normalized scan data is independent of mass fractionation effects, and thus it gives a realistic estimate of the internal precision of both runs.

**Optimization of parameters**

Optimization of the 205 spike composition was performed using the error model described above. In order to optimize the spike composition, as well as other parameters, such as *p*, *q*, and *R* (the ratio of the amount of Pb sample in the 205 spiked run to that in the 207 spiked run), internal precision for the measured ratios of the spiked runs (matrices **V**M and **V**N) is modeled as follows. Assuming that the individual ion currents of lead isotopes are not correlated with each other, the uncertainty of the isotope ratio 20XPb/204Pb (X = 5, 6, 7, 8) can be expressed as

, (12)

where *I*20X is the ion beam intensity of 20XPb (background-corrected), and are the uncertainties of the measurements of *I*20X and *I*204, respectively.19 The uncertainty is used as an analytical error of each isotopic ratio, corresponding to the internal precision through the “averaged-normalization method” in actual spectrometry analyses. For simplicity, covariance among the different isotope ratios is ignored. The uncertainty (Y = 4, 5, 6, 7, 8) is calculated according to the model of ref. 18 and 19 in the text.

To calculate the uncertainty , ion beam intensities of individual isotopes must be given. In the following optimizations, the total ion intensity (*I*tot) is expressed as a function of the amount of Pb sample, by assuming that the total ion intensity solely depends on the amount of Pb, irrespective of isotopic composition. For analyses of small Pb samples processed with column chromatography in our laboratory, ion beam intensities for 208Pb are about 300, 1200, and 2500 mV for 1, 5, and 10 ng of Pb, respectively. Using the isotopic abundance of 208Pb in NBS981, the total ion intensity is approximated as *I*tot = 480 × *x*, in which *x* indicates the amount of Pb (ng).

Because the 205Pb/204Pb ratio is important in the compositions of the 205 spike, this ratio was treated as a variable. In the optimization, the parameter *p* and *R* are fixed to *p* = 200 and *R* = 5 (see text). This treatment does not significantly affect the result of the optimization of the spike composition. The amount of Pb sample, *x*, is 1 ng, and the isotopic compositions of NBS981 is used. Fig. S1 shows the variation of the relative error for the corrected 206Pb/204Pb ratio of the sample with the parameter *q*. As the 205Pb/204Pb ratio of the 205 spike increases, the propagated error tends to be reduced. However, the error is not significantly improved for 205Pb/204Pb ratios higher than ~5. From this result, we selected a 205Pb/204Pb ratio of ~5 for the 205 spike.

**Fig. S1** Comparison of the propagated errors for the corrected isotopic ratio (206Pb/204Pb) of the unknown sample, for various compositions of the 205Pb-204Pb double spike as a function of *q*. The composition of the double spike with a 205Pb/204Pb ratio of > ~5 is desirable.

**Calibration method of the spike compositions**

The compositions of each double spike were calibrated by the “normal double spike method”: the true composition of NBS982 (given in the text) was the known “spike composition”, the measurement of a pure double spike represented an “unspiked run”, and the measurement of a spike–NBS982 mixture constituted a “spiked run”, according to ref. 1 in the text. In the case of the calibration of the 207 spike composition, the mixing relationships between the 207 spike (*s*i) and NBS982 (*w*i) is written as

*m*i ( 1 + *p* ) = *s*i + *w*i · *p*, (13)

where *m*i indicates the true isotopic composition of the 207 spike–NBS982 mixture. The linear fractionation law for the “unspiked run” and “spiked run” can be expressed as

*s*i = *S*i ( 1 + **i · **s ) (14)

and

*m*i = *M*i ( 1 + **i · **m ) (15)

respectively, where *S*i and **s denote the measured composition of the pure 207 spike and the mass fractionation factor for the “unspiked run”, and *M*i and **m are the measured composition of the 207 spike–NBS982 mixture and the mass fractionation factor for the “spiked run”. Combining (14) and (15) gives:

( *M*i – *w*i ) · *p* + *M*i · **i · ( 1 + *p* ) · **m – *S*i · **i ·**s = *S*i – *M*i (i: 1,2,3) (16)

Three unknown variables, *p*, **m, and **s, can be obtained from the above three independent equations. The true isotopic composition of the 207 spike is then obtained from equation (14), by substituting **s and the measured composition *S*i.

The calibration procedures of the 205Pb-204Pb double spike is essentially similar to those described above. Note, however, that we have four independent equations, although there are only three unknown variables, *q*, **n, and **t:

( *N*i – *w*i ) · *q* + *N*i · **i · ( 1 + *q* ) · **n – *T*i · **i ·**t = *T*i – *N*i (i: 0,1,2,3) (17)

in which *T*i is the measured composition of the pure 205 spike, *N*i is the measured composition of the 205 spike–NBS982 mixture, and **t and **n are the mass fractionation factors for the “unspiked run” and “spiked run”, respectively. Therefore, these unknown variables can be obtained from any three equations from the four equations. The calibrated composition of the 205 spike is mostly independent of the combinations of three equations from the four equations.
